# Supplementary material
Source: publisher figshare collection journal article supplement (https://karger.figshare.com/ndownloader/files/30468924)
Supplement: Supplementary file 1 [file 30468924]

**Supplementary table 4:** Comparison of FCal between diagnosis, sex, age, smoking status and disease duration within a medication group

| **Parameter** | **Lab marker** | **Medication** | **GMR (95% CI)** | **p-value** |
| --- | --- | --- | --- | --- |
| Diagnosis (CD vs. UC) | FCal | Infliximab  Vedolizumab | 0.98 (0.51; 1.85)  1.18 (0.20; 7.12) | 0.94  0.86 |
| Sex (male vs. female) | FCal | Infliximab  Vedolizumab | 0.83 (0.47; 1.47)  3.12 (0.46; 21.36) | 0.52  0.26 |
| Age | FCal | Infliximab  Vedolizumab | 1.00 (0.98; 1.02)  0.98 (0.93; 1.04) | 0.69  0.55 |
| Smoker (yes vs. no) | FCal | Infliximab  Vedolizumab | 1.70 (0.89; 3.24)  0.34 (0.06; 1.95) | 0.11  0.24 |
| Smoker (ex vs. no) | FCal | Infliximab  Vedolizumab | 1.59 (0.70; 3.63)  1.38 (0.11; 17.74) | 0.27  0.81 |
| Disease duration | FCal | Infliximab  Vedolizumab | 1.00 (0.97; 1.03)  1.06 (0.94; 1.20) | 0.81  0.34 |
